# Supplementary material for: Expression of transgenes enriched in rare codons is enhanced by the MAPK pathway
Source: PubMed Central journal article supplement (PMC7746698; doi:10.1038/s41598-020-78453-5), 2020-12-17
Supplement: 41598_2020_78453_MOESM1_ESM.pdf [file 41598_2020_78453_MOESM1_ESM.pdf]

# Expression of mammalian transgenes enriched in rare codons is enhanced by the MAPK pathway

**Jackson Peterson<sup>1,#</sup>, Siqi Li<sup>1,#</sup>, Erin Kaltenbrun<sup>1</sup>, Ozgun Erdogan<sup>1</sup>, and Christopher M. Counter<sup>1,2,\*</sup>**

<sup>1</sup>Department of Pharmacology & Cancer Biology, Duke University Medical Center, Durham NC, 27710.

<sup>2</sup>Department of Radiation Oncology, Duke University Medical Center, Durham NC, 27710.

#These authors contributed equally: Jackson Peterson, Siqi Li.

\*email: count004@mc.duke.edu

Supplementary Figure 1. cDNAs.

Supplementary Figure 2. A reporter to characterize the expression of rare-codon enriched transcripts.

Supplementary Figure 3. MAPK pathway enhances the expression of rare-codon enriched transcripts.

Supplementary Figure 4. MAPK pathway enhances the translation of rare-codon enriched transcripts.

Supplementary Figure 5. Uncropped immunoblots shown in figures.

Supplementary Table 1. Summary of the Cancer Toolkit (CTK) lentiviral library screen.

**a**

cDNA: GFP<sup>rare</sup>

CAI: 0.729

Source: gene synthesis

5'ATGGTGAGTAAAGGAGAAGAACTTTTCACTGGAGTTGTCCCAATTCTTGTTGAATTAGATGGCGATGTTAATG  
GGCAAAAATTCTCTGTCAGTGGAGAGGGTGAAGGTGATGCAACATACGGAAAACCTTACCCTTAAATTTATTTGC  
ACTACTGGGAAGCTACCTGTTCCATGGCCAACACTTGTCACTACTCTGACCTATGGTGTTCATGCTTTTCAAGAT  
ACCCAGATCATATGAAACAGCATGACTTTTTCAAGAGTGCCATGCCCGAAGGTTATGTACAGGAAAGAACTATA  
TTTTACAAAGATGACGGGAACTACAAGACACGTGCTGAAGTCAAGTTTGAAGGTGATACCCTTGTTAATAGAAT  
CGAGTTAAAAGGTATTGATTTTAAAGAAGATGGAAACATTCTTGGACACAAAATGGAATACAACATAACTCAC  
ATAATGTATACATCATGGCAGACAAACCAAAGAATGGAATCAAAGTTAACTTCAAATTAGACACAACATTA  
GATGGAAGCGTTCAATTAGCAGACCATTATCAACAAAATACTCCAATTGGCGATGGCCCTGTCCTTTTACCAGAC  
AACCATTACCTGTCCACACAATCTGCCCTTCCAAAGATCCCAACGAAAAGAGAGATCACATGATCCTTCTTGAG  
TTTGTAACAGCTGCTGGGATTACACATGGCATGGATGAACTATACAAATAA

**b**

cDNA: GFP<sup>com</sup>

CAI: 0.962

Source: pEGFP-c3; Clontech

ATGGTGAGCAAGGGCGAGGAGCTGTTACCGGGGTGGTGCCATCCTGGTCGAGCTGGACGGCGACGTA  
GGCCACAAGTTCAGCGTGTCCGGCGAGGGCGAGGGCGATGCCACCTACGGCAAGCTGACCCTGAAGTTCATCT  
GCACCACCGGCAAGCTGCCCGTGCCTGGCCACCCTCGTGACCACCCTGACCTACGGCGTGCAGTGCTTCAGC  
CGCTACCCCGACCACATGAAGCAGCAGACTTCTTCAAGTCCGCCATGCCCGAAGGCTACGTCCAGGAGCGCAC  
CATCTTCTTCAAGGACGACGGCAACTACAAGACCCGCGCCGAGGTGAAGTTCGAGGGCGACACCCTGGTGAAC  
CGCATCGAGCTGAAGGGCATCGACTTCAAGGAGGACGGCAACATCCTGGGGCACAAGCTGGAGTACA  
ACTACAACAGCCACAACGTCTATATCATGGCCGACAAGCAGAAGAACGGCATCAAGGTGAACTTCAAGATCCGCCACAAC  
ATCGAGGACGGCAGCGTGAGCTCGCCGACCACTACCAGCAGAACACCCCATCGGCGACGGCCCCGTGCTGC  
TGCCCGACAACCACTACCTGAGCACCCAGTCCGCCCTGAGCAAAGACCCCAACGAGAAGCGCGATCACATGGTC  
CTGCTGGAGTTCGTGACCGCCGCGGGATCACTCTCGGCATGGACGAGCTGTACAAGTAA

**c**

cDNA: mCherry<sup>com</sup>

CAI: 0.965

Source: mCherry2-C1 plasmid; Addgene 54563

5'ATGGTGAGCAAGGGCGAGGAGGATAACATGGCCATCATCAAGGAGTTCATGCGCTTCAAGGTGCACATGGA  
GGGCTCCGTGAACGGCCACGAGTTCGAGATCGAGGGCGAGGGCGAGGGCCGCCCTACGAGGGCACCCAGAC  
CGCCAAGCTGAAGGTGACCAAGGGTGGCCCCCTGCCCTTCGCTGGGACATCCTGTCCCCTCAGTTCATGTACG  
GCTCCAAGGCCTACGTGAAGCACCCCGCGACATCCCCGACTACTTGAAGCTGTCTTCCCCGAGGGCTTCAATT  
GGGAGCGCGTGATGAACTTCGAGGACGGCGGCGTGGTGACCGTGACCCAGGACTCCTCCCTGCAGGACGGCG  
AGTTCATCTACAAGGTGAAGCTGCGCGGCACCAACTCCCCTCCGACGGCCCCGTAATGCAGTGTCTGATCATG  
GGCTGGGAGGCTCCACTGAGCGGATGTACCCCGAGGACGGCGCCCTGAAGGGCGAGATCAAGCAGAGGCTG  
AAGCTGAAGGACGGCGGCCACTACGACGCTGAGGTCAAGACCACCTACAAGGCCAAGAAGCCCGTGCAGCTGC  
CCGGCGCTACAACGTGACATCAAGTTGGACATCCTTTCCACAACGAGGACTACACCATCGTGGAAACAGTAC  
GAACGCGCCGAGGGCCGCACTCCACCGCGGCATGGACGAGCTGTACAAGTAA

**d**

cDNA: mCherry<sup>rare</sup>

CAI: 0.731

Source: gene synthesis

5'ATGGTCTCAAAGGGTGAAGAAGATAACATGGCAATTATTAAGAGTTTATGCGTTTCAAGGTGCATATGGAG  
GGATCTGTCAATGGGCATGAGTTTGAATTGAAGGTGAAGGAGAAGGCCGACCATATGAGGGAACACAAACC  
GCAAACTAAAGGTAACATAAGGCGGACCATTACCATTCGCCTGGGACATCCTCTCTCCACAGTTCATGTATGGA  
AGTAAAGCTTATGTTAAACATCCGGCAGATATAACCAGATTATTTGAACTTTTCATCCCGGAGGGTTTTAAGTGG  
GAACGCGTAATGAATTTTGAAGACGGAGGAGTTGTTACAGTGACGCAAGACTCAAGCCTCCAAGATGGAGAAT  
TTATTTATAAGTCAAACCTTCGAGGAACGAATTTCCCTCGGATGGACCTGTTATGCAGAAGAAGACTATGGGA  
TGGGAAGCTTCAAGTAAAAGAATGTACCCTGAAGACGGTCTCTTAAGGGAGAGATTAACAACGTCTTAAATT  
GAAAGATGGAGGACATTACGATGCTGAGGTGAAGACAACCTACAAAGCCAAAAAACCAGTTTCAGCTGCCAGGA  
GCGTACAATGTTAATATTAACCTGGATATCACCTCCCACAACGAGGATTACACTATCGTTGAGCAATATGAAAGA  
GCTGAAGGGCGGCACTCGACAGGTGGCATGGATGAATTGTATAAGTAA

**e**

cDNA: GFP<sup>opt20</sup>

CAI: 0.806

Source: gene synthesis, rare codons for all leucine and glycine converted to common, converted nucleotides are marked by lower case

5'ATGGTGAGTAAAGGcGAAGAACTgTTCACTGGgGTTGTCCCAATTCTgGTTGAActgGATGGCGATGTTAATGG  
cAAAAAATTCTCTGTGCTGAGTGGcGAGGGcGAAGGcGATGCAACATACGGcAAACTgACCCTgAAATTTATTTGCACT  
ACTGGcAAGCTgCCTGTTCCATGGCCAACACTcGTCACTACTCTGACCTATGGcGTTCAATGCTTTTCAAGATAACC  
CAGATCATATGAAACAGCATGACTTTTTCAAGAGTGCCATGCCCCAAGGcTATGTACAGGAAAGAACTATATTTT  
ACAAAGATGACGGcAACTACAAGACACGTGCTGAAGTCAAGTTTGAAGGcGATACCCTgGTTAATAGAATCGAG  
ctgAAAGGcATTGATTTTAAAGAAGATGGcAACATTCTgGGgCACAAAATGGAATACAACATAACTCACATAATG  
TATACATCATGGCAGACAAACCAAGAATGGcATCAAAGTAACTTCAAATTAGACACAACATTAAGATGGc  
AGCGTTCAAActcGCAGACCATTATCAACAAAATACTCCAATTGGCGATGGCCCTGTCTgctgCCAGACAACCATTA  
CCTGTCCACACAATCTGCCCTgTCCAAAGATCCCAACGAAAAGAGAGATCACATGATCCTgCTgGAGTTTGTAA  
AGCTGCTGGGATTACACATGGCATGGATGAACTgTACAAATAA

**f**

cDNA: GFP<sup>opt40</sup>

CAI: 0.858

Source: gene synthesis, rare codons for all leucine, glycine, valine and lysine converted to common, converted nucleotides are marked by lower case

5'ATGGTGAGTAAgGGcGAAGAACTgTTCACTGGgGTgGTgCCAATTCTgGTcGAActgGATGGCGATGTaAATGGc  
CAAAAgTTCTCTGTgAGTGGcGAGGGcGAAGGcGATGCAACATACGGcAAgCTgACCCTgAAgTTTATTTGCACTA  
CTGGcAAGCTgCCTGTgCCATGGCCAACACTcGTgACTACTCTGACCTATGGcGTgCAATGCTTTTCAAGATACCCA  
GATCATATGAAgCAGCATGACTTTTTCAAGAGTGCCATGCCCCAAGGcTATGTcCAGGAAAGAACTATATTTTAC  
AAgGATGACGGcAACTACAAGACACGTGCTGAAGTgAAGTTTGAAGGcGATACCCTgGTgAATAGAATCGAGctg  
AAgGGcATTGATTTTAAgGAAGATGGcAACATTCTgGGgCACAAgATGGAATACAACATAACTCACATAATGTcT  
ACATCATGGCAGACAAGcCAAAGAATGGcATCAAAGTgAACTTCAAgATTAGACACAACATTAAGATGGcAGCG  
TgCAAActcGCAGACCATTATCAACAAAATACTCCAATTGGCGATGGCCCTGTgCTgctgCCAGACAACCATTAACCTG

TCCACACAATCTGCCCTgTCCAAAGATCCCAACGAAAAGAGAGATCACATGATCCTgCTgGAGTTTGTgACAGCT  
GCTGGGATTACACATGGCATGGATGAACTgTACAAGTAA

**g**

cDNA: GFP<sup>opt60</sup>

CAI: 0.888

Source: gene synthesis, rare codons for all leucine, glycine, valine, lysine, threonine, aspartic acid, and glutamic acid converted to common, converted nucleotides are marked by lower case

5'ATGGTGAGTAAgGGcGAgGAgCTgTTCACcGGgGTgGTgCCAATTCTgGTcGAgctgGAcGGCGAcGTaAATGGcC  
AAAAGTTCTCTGTgAGTGGcGAGGGcGAgGGcGATGCAACcTACGGcAAgCTgACCCTgAAgTTTATTTGCACcACc  
GGcAAGCTgCCTGTgCCATGGCCAACcCTcGTgACcACcCTGACCTATGGcGTgCAATGCTTTTCAAGATACCCAGA  
cCATATGAAgCAGCATGACTTTTTCAAGAGTGCCATGCCCCAAGGcTATGTcCAGGAgAGAACcATATTTTACAAG  
GAcGACGGcAACTACAAGACcCGTGCTGAgGTgAAGTTTGAgGGcGAcACCCTgGTgAATAGAATCGAGctgAAgG  
GcATTGAcTTTAAgGAgGAcGGcAACATTCTgGGgCACAAGATGGAgTACAACATAACTCACATAATGTcTACATC  
ATGGCAGACAAGCCAAAGAATGGcATCAAgGTgAACTTCAAgATTAGACACAACATTAAGAcGGcAGCGTgCAA  
ctcGCAGACCATTATCAACAAAATACcCCAATTGGCGAcGGCCCTGTgCTgctgCCAGACAACCATTACCTGTCCACc  
CAATCTGCCCTgTCCAAAGAcCCCAACGAgAAGAGAGATCACATGATCCTgCTgGAGTTTGTgACcGCTGCTGGGA  
TTAcTcATGGCATGGAcGAgCTgTACAAGTAA

**h**

cDNA: GFP<sup>opt80</sup>

CAI: 0.912

Source: gene synthesis, rare codons for all leucine, glycine, valine, lysine, threonine, aspartic acid, glutamic acid, isoleucine, serine and proline converted to common, converted nucleotides are marked by lower case

5'ATGGTGAGcAAgGGcGAgGAgCTgTTCACcGGgGTgGTgCCcATcCTgGTcGAgctgGAcGGCGAcGTaAATGGcC  
AAAAGTTCagcGTgtccGGcGAGGGcGAgGGcGATGCAACcTACGGcAAgCTgACCCTgAAgTTTATcTGCACcACcG  
GcAAGCTgCCcGTgCCcTGGCCcACcCTcGTgACcACcCTGACCTATGGcGTgCAATGCTTTAgcAGATAACCCGAcCA  
TATGAAgCAGCATGACTTTTTCAAGtccGCCATGCCCCAAGGcTATGTcCAGGAgAGAACcATcTTTTACAAGGAcG  
ACGGcAACTACAAGACcCGTGCTGAgGTgAAGTTTGAgGGcGAcACCCTgGTgAATAGAATCGAGctgAAgGGcAT  
cGAcTTTAAgGAgGAcGGcAACATcCTgGGgCACAAGATGGAgTACAACATAACagcCATAATGTcTACATCATGG  
CAGACAAGCCAAAGAATGGcATCAAgGTgAACTTCAAgATcAGACACAACATcAAAGAcGGcAGCGTgCAActcGC  
AGACCATTATCAACAAAATACcCCcATcGGCGAcGGCCcGTgCTgctgCCcGACAACCATTACCTGagCACcCAATC  
cGCCCTgagCAAAGAcCCCAACGAgAAGAGAGATCACATGATCCTgCTgGAGTTTGTgACcGCTGCTGGGATcActC  
ATGGCATGGAcGAgCTgTACAAGTAA

**i**

cDNA: GFP<sup>opt100</sup>

CAI: 0.960

Source: gene synthesis, rare codons for all leucine, glycine, valine, lysine, threonine, aspartic acid, glutamic acid, isoleucine, serine, proline, phenylalanine, alanine, glutamine, histidine, asparagine, tyrosine and arginine converted to common, converted nucleotides are marked by lower case

5'ATGGTGAGcAAgGGcGAgGAgCTgTTCACcGGgGTgGTgCCcATcCTgGTcGAgctgGAcGGCGAcGTaAAcGGcC  
AAAAGTTCagcGTgtccGGcGAGGGcGAgGGcGATGcACcTACGGcAAgCTgACCCTgAAgTTcATcTGCACcACcG

GcAAGCTgCCcGTgCCcTGGCCcACcCTcGTgACcACcCTGACCTAcGGcGTgCAGTGCTTcagccgcTACCCcGAcCac  
ATGAAgCAGCAGcGACTTcTTCAAGtccGCCATGCCCGAAGGcTAcGTcCAGGAgcGcACcATcTTcTACAAGGAcGAC  
GGcAACTACAAGAcCcGcGcGAgGTgAAGTTcGAgGGcGAcACCCTgGTgAAccGcATCGAGctgAAgGGcATcGA  
cTTcAAgGAgGAcGGcAACATcCTgGGgCACAAgATGGAgTACAACtAcAACagcCAcAAcGTcTAtATCATGGCcGA  
CAAgCCAAAGAAcGGcATCAAgGTgAACTTCAAgATccGcCACAAcATcAAAGAcGGcAGCGTgCagctcGcGACC  
AcTAcCAGcAgAAcCcCCcATcGGCGAcGGCCcGTgCTgctgCCcGACAACCcTACCTGagCACcAgTCcGCCCTg  
agCAAAGAcCCCAACGAgAAGcGcGATCACATGATCCTgCTgGAGTTcGTgACcGcGcGGGATcActCATGGCAT  
GGAcGAgCTgTACAAGTAA

**j**

cDNA: FLAG-GAG  
CAI: 0.759  
Source: pGAG-EGFP

ATGGACTACAAGGACGACGATGACAAGATGGGTGCGAGAGCGTCAGTATTAAGCGGGGGAGAATTAGATCGA  
TGGGAAAAAATTCGGTTAAGGCCAGGGGAAAGAAGAAGTACAAGCTAAAGCACATCGTATGGGCAAGCAGG  
GAGCTAGAACGATTCGAGTTAATCCTGGCCTGTTAGAAACATCAGAAGGCTGTAGACAAATACTGGGACAGCT  
ACAACCATCCCTTCAGACAGGATCAGAGGAGCTTCGATCACTATACAACACAGTAGCAACCCTCTATTGTGTGCA  
CCAGCGGATCGAGATCAAGGACACCAAGGAAGCTTTAGACAAGATAGAGGAAGAGCAAACAAGTCCAAGAA  
GAAGGCCAGCAGGCAGCAGCTGACACAGGACACAGCAATCAGGTCAGCCAAAATTACCCTATAGTGCAGAAC  
ATCCAGGGGCAAATGGTACATCAGGCCATATCACCTAGAACTTTAAATGCATGGGTAAAAGTAGTAGAAGAGA  
AGGCTTTCAGCCAGAAGTGATACCCATGTTTTAGCATTATCAGAAGGAGCCACCCACAGGACCTGAACACG  
ATGTTGAACACCGTGGGGGACATCAAGCAGCCATGCAAATGTTAAAAGAGACCATCAATGAGGAAGCTGCAG  
AATGGGATAGAGTGCATCCAGTGCATGCAGGGCCTATTGCACCAGGCCAGATGAGAGAACCAAGGGGAAGTG  
ACATAGCAGGAATACTAGTACCCTTCAGGAACAAATAGGATGGATGACAAATAATCCACCTATCCCAGTAGGA  
GAGATCTACAAGAGGTGGATAATCCTGGGATTGAACAAGATCGTGAGGATGTATAGCCCTACCAGCATTCTGG  
ACATAAGACAAGGACCAAAAAGAACCCTTTAGAGACTATGTAGACCGGTTCTATAAAACTCTAAGAGCTGAGCAA  
GCTTCACAGGAGGTAATAAATTGGATGACAGAAACCTTGTGGTCCAAAATGCGAACCCAGATTGTAAGACCAT  
CCTGAAGGCTCTCGGCCAGCGGCTACACTAGAAGAAATGATGACAGCATGTCAGGGAGTAGGAGGACCCGGC  
CATAAGGCAAGAGTTTTGGCTGAAGCAATGAGCCAAGTAACAAATTCAGCTACCATAATGATGCAGAGAGGCA  
ATTTTAGGAACCAAGAAAGATTGTTAAGTGTTCATTGTGGCAAAGAAGGGCACACAGCCAGAAATTGCAG  
GGCCCTAGGAAAAGGGCTGTTGGAAATGTGGAAAGGAAGGACACCAATGAAAGATTGTACTGAGAGACA  
GGCTAATTTTTAGGGAAGATCTGGCCTTCTACAAGGGAAGGCCAGGGAATTTCTTCAGAGCAGACCAGAGC  
CAACAGCCCCACCAGAAGAGAGCTTCAGGTCTGGGGTAGAGACAACAACCTCCCCCTCAGAAGCAGGAGCCGAT  
AGACAAGGAACTGTATCCTTTAACTTCCCTCAGATCACTCTTTGGCAACGACCCCTCGTACAATAA

**k**

cDNA: FLAG-GAG<sup>com</sup>  
CAI: 0.995  
Source: gene synthesis, based on p96ZM651.8 Gag sequence (NIH AIDS Reagent Program; 8675) with  
codon-optimized amino acid substitutions to match the exact amino acid sequence of Gag<sup>rare</sup>.

ATGGACTACAAGGACGACGATGACAAGATGGGCGCCCGCGCCAGCGTGCTGAGCGGGCGGAGCTGGACCGG  
TGGGAGAAGATCCGCTGCGCCCCGGCGGCAAGAAGAAGTACAAGCTGAAGCACATCGTGTGGCCAGCCGC  
GAGCTGGAGCGCTTCGCCGTGAACCCCGCCCTGCTGGAGACCAGCGAGGGCTGCCGGCAGATCCTGGCCAG  
CTGCAGCCCAGCCTGCAGACCGGCAGCGAGGAGCTGCGCAGCCTGTACAACACCGTGGCCACCCTGTACTGCG  
TGCACCAGCGGATCGAGATCAAGGACACCAAGGAGGCCCTGGACAAGATCGAGGAGGAGCAGAACAAGAGCA

AGAAGAAGGCCAGCAGGCCGCCGCCGACACCGGCCACAGCAACCAGGTGAGCCAGAACTACCCCATCGTGCA  
GAACATCCAGGGCCAGATGGTGCACCAGGCCATCAGCCCCGCACCCTGAACGCCTGGGTGAAGGTGGTGGAG  
GAGAAGGCCTTCAGCCCCGAGGTGATCCCCATGTTTCAGCGCCCTGAGCGAGGGCGCCACCCCCAGGACCTGA  
ACACCATGCTGAACACCGTGGGCGGCCACCAGGCCGCATGCAGATGCTGAAGGAGACCATCAACGAGGAGG  
CCGCCGAGTGGGACCGCGTGCACCCCGTGCACGCCGCCCATCGCCCCGCCAGATGCGCGAGCCCCGCGG  
CAGCGACATCGCCGGCACCACCAGCACCCCTGCAGGAGCAGATCGGCTGGATGACCAACAACCCCCCATCCCCG  
TGGGCGAGATCTACAAGCGCTGGATCATCCTGGGCCTGAACAAGATCGTGCGCATGTACAGCCCCACCAGCATC  
CTGGACATCCGGCAGGGCCCCAAGGAGCCCTTCCGCGACTACGTGGACCGCTTCTACAAGACCCTGCGCGCCGA  
GCAGGCCAGCCAGGAGGTGAAGAACTGGATGACCGAGACCCTGCTGGTGCAGAACGCCAACCCCGACTGCAA  
GACCATCTGAAGGCCCTGGGCCCGCCGCCACCCTGGAGGAGATGATGACCGCCTGCCAGGGCGTGGGCGGC  
CCCGGCCACAAGGCCCGCTGCTGGCCGAGGCCATGAGCCAGGTGACCAACAGCGCCACCATCATGATGCAGC  
GGGGCAACTTCCGGAACCAGCGGAAGATCGTGAAGTGCTTCAACTGCGGCAAGGAGGGCCACACCGCCCGCA  
ACTGCCGCGCCCCCGCAAGAAGGGCTGCTGGAAGTGCAGGCAAGGAGGGCCACCAGATGAAGGACTGCACCG  
AGCGCCAGGCCAACTTCTGGGCAAGATCTGGCCAGCTACAAGGGCCGCCCGGCAACTTCTGCGAGAGCCG  
CCCCGAGCCCACCGCCCCCCCCGAGGAGAGCTTCCGACGCGCGTGGAGACCACCACCCCCCCCCAGAAGCAG  
GAGCCATCGACAAGGAGCTGTACCCCTGACCAGCCTGCGGAGCCTGTTTCGGCAACGACCCAGCAGCCAGT  
AA

I

cDNA: FLAG-KRAS

CAI: 0.752

Source: Cloned from previously described pBabePuro-KRAS construct<sup>22</sup>.

ATGGACTACAAAGACGATGACGACAAGACTGAATATAAATTGTGGTAGTTGGAGCTGGTGGCGTAGGCAAGA  
GTGCCTTGACGATACAGCTAATTCAGAATCATTTTGTGGACGAATATGATCCAACAATAGAGGATTCCTACAGG  
AAGCAAGTAGTAATTGATGGAGAACTGTCTCTTGGATATTCTCGACACAGCAGGTCAAGAGGAGTACAGTGC  
AATGAGGGACCAGTACATGAGGACTGGGGAGGGCTTTCTTTGTGATTTGCCATAAATAACTAAATCATTTG  
AAGATATTCACCATTATAGAGAACAATTAAGAGTAAAGGACTCTGAAGATGTACCTATGGTCTAGTAGGA  
AATAAATGTGATTTGCCTTCTAGAACAGTAGACACAAAACAGGCTCAGGACTTAGCAAGAAGTTATGGAATTC  
TTTTATTGAAACATCAGCAAAGACAAGACAGAGAGTGGAGGATGCTTTTTATACATTGGTGAGAGAGATCCGAC  
AATACAGATTGAAAAAATCAGCAAAGAAGAAAAGACTCCTGGCTGTGTGAAAATTAATAAATGCATTATAATG  
TAA

m

cDNA: FLAG-HRAS

CAI: 0.90

Source: Cloned from previously described pBabePuro-HRAS construct<sup>22</sup>.

ATGGACTACAAAGACGATGACGACAAGACGGAATATAAGCTGGTGGTGGTGGGCGCTGGAGGCGTGGGAAAG  
AGTGCCCTGACCATCCAGCTGATCCAGAACCACTTTGTGGACGAATACGACCCCACTATAGAGGATTCCTACCG  
GAAGCAGGTGGTCATTGATGGGGAGACGTGCCTGTTGGACATCCTGGATACCGCCGCCAGGAGGAGTACAG  
CGCCATGCGGGACCAGTACATGCGCACCGGGGAGGGCTTCTGTGTGTGTTTGCCATCAACAACACCAAGTCTT  
TTGAGGACATCCACCAGTACAGGGAGCAGATCAAACGGGTGAAGGACTCGGATGACGTGCCCATGGTGTGGT  
GGGGAACAAGTGTGACCTGGCTGCACGCACTGTGGAATCTCGGCAGGCTCAGGACCTCGCCGAAGCTACGGC  
ATCCCCTACATCGAGACCTCGGCCAAGACCCGGCAGGGAGTGGAGGATGCCTTCTACACGTTGGTGCCTGAGA  
TCCGGCAGCACAAGCTGCGGAAGCTGAACCCTCCTGATGAGAGTGGCCCCGGCTGCATGAGCTGCAAGTGTGT  
GCTCTCCTGA

**Supplementary Figure 1. cDNAs. (a-m)** Gene name, CAI, source, and nucleotide sequence of cDNAs used as reporters.

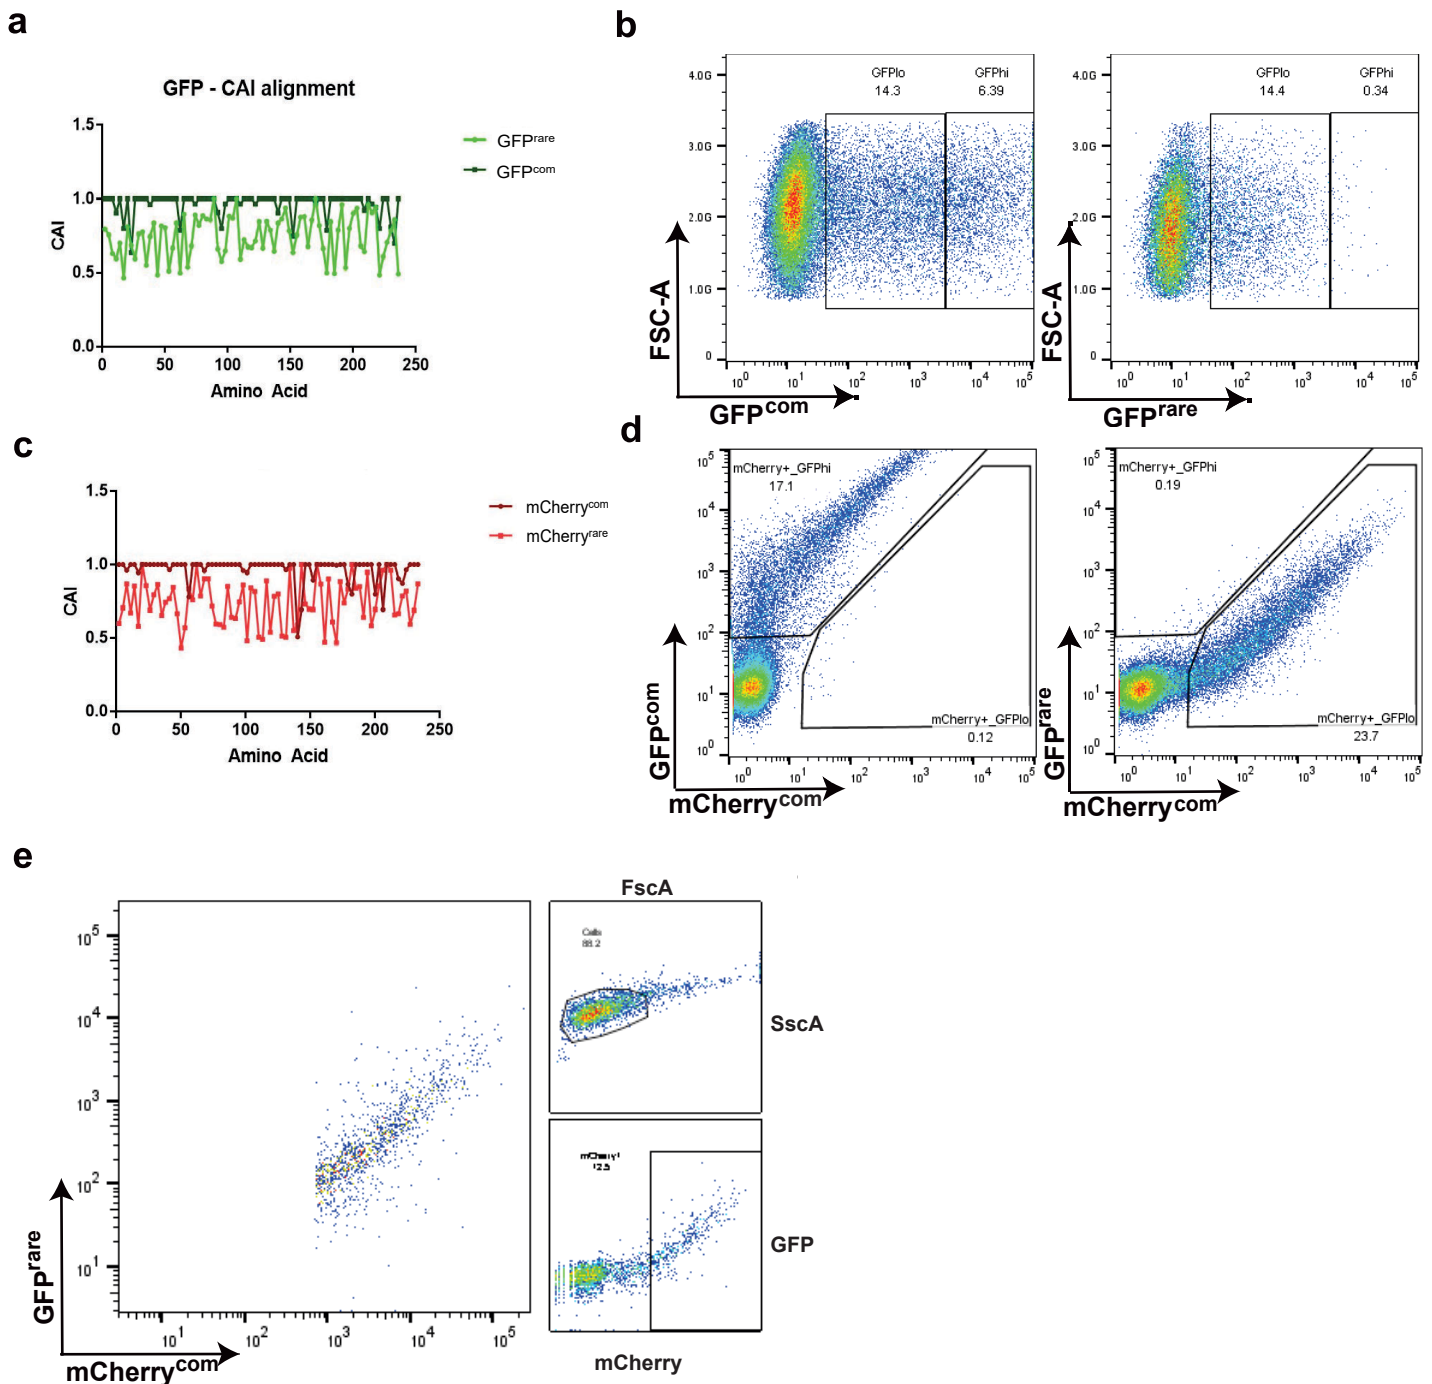

**Supplementary Figure 2. A reporter to characterize the expression of rare-codon enriched transcripts. (a,c)** Codon Adaptation Index (CAI) plotted as a function of amino acid residue for the indicated reporters. **(b,d)** Flow cytometry plots of single **(b)** and dual color **(d)** reporters with gates drawn to illustrate differences in the ability of each respective assay to exclude events from reporters using different codon usages. X axis: GFP intensity; Y axis: forward scatter area; GFP<sup>lo</sup>: GFP low; GFP<sup>hi</sup>: GFP high; Number indicates the percentage of highlighted population. **(e)** Flow cytometry plots demonstrating common gating scheme used to generate mean fluorescence intensities in this work; cells were gated according to forward and side scatter (FSC and SSC, respectively) and the MFI of positively transfected cells was calculated for each fluorescent reporter.

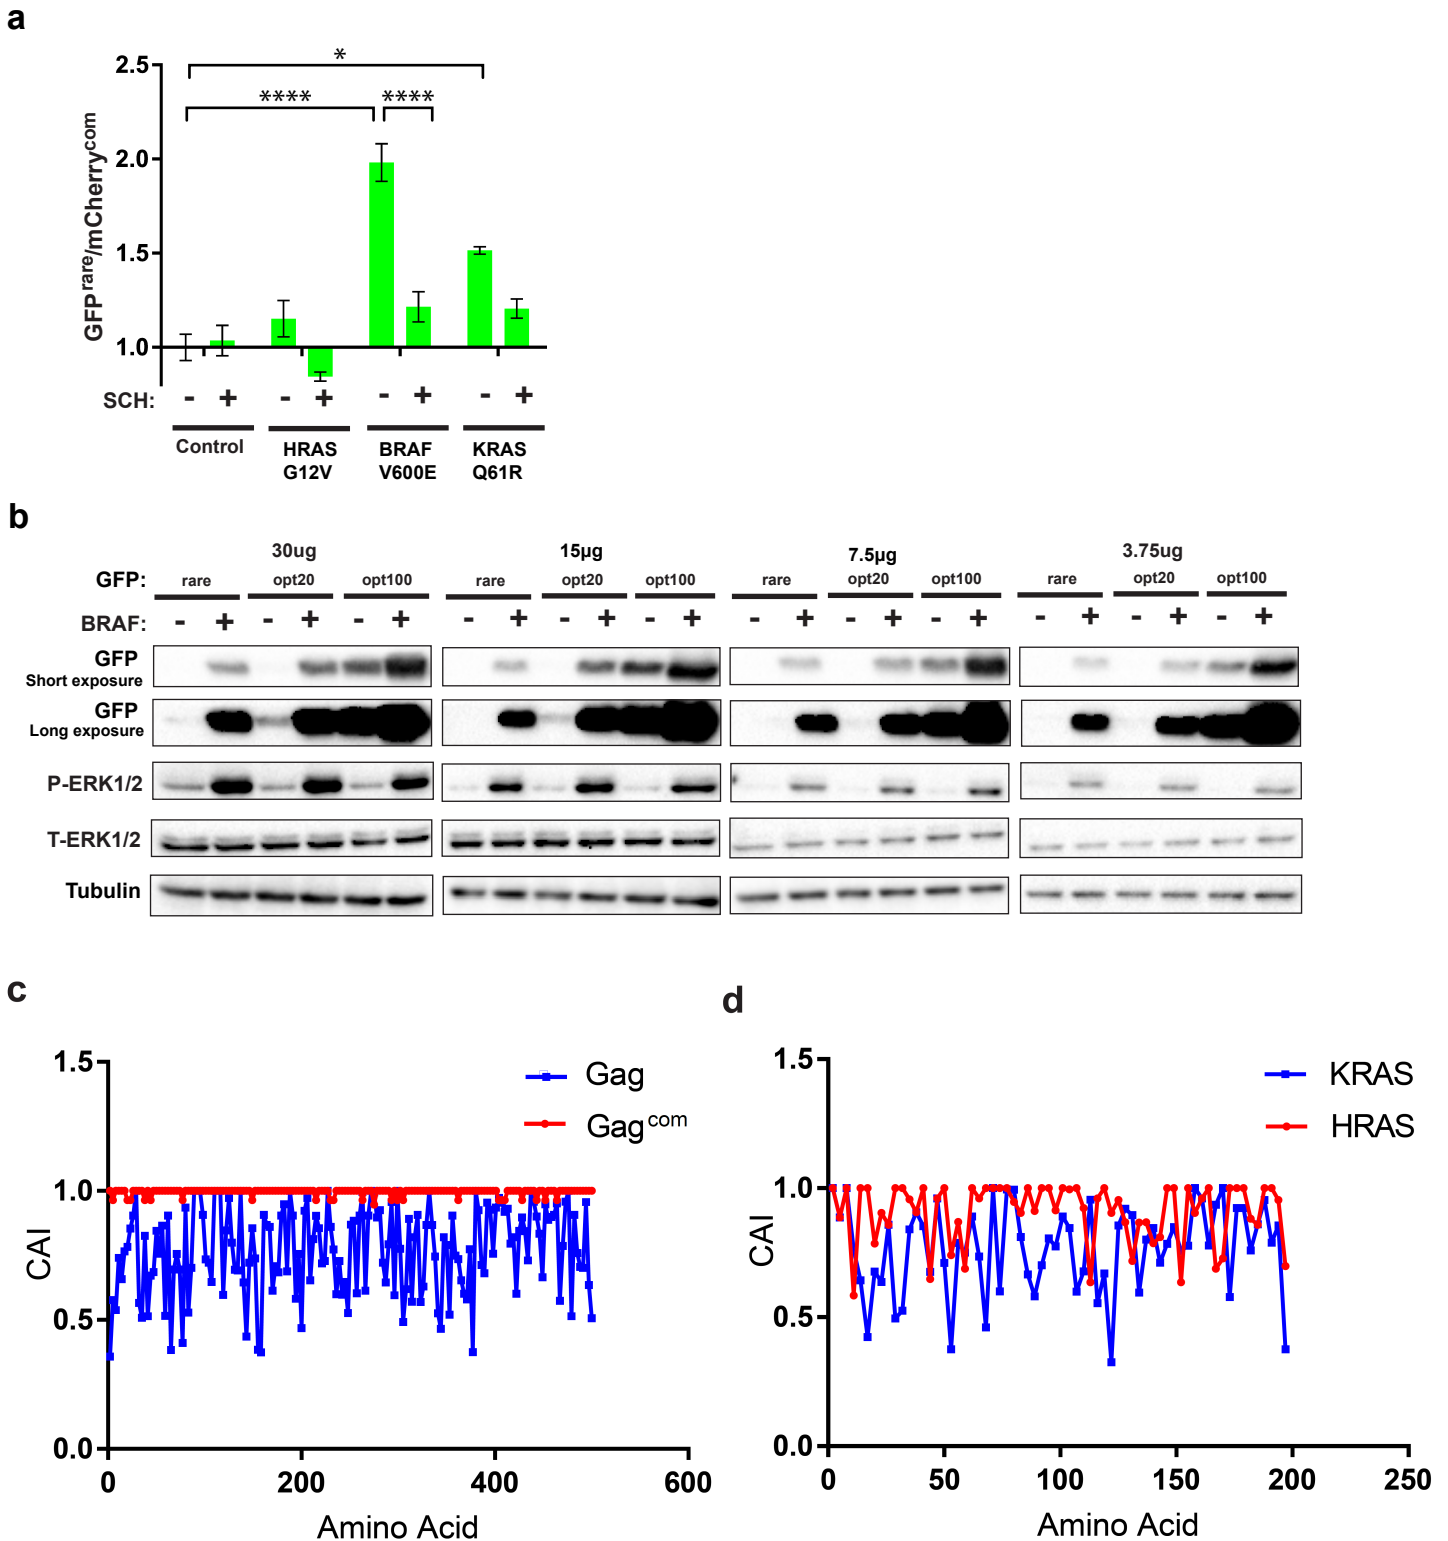

**Supplementary Figure 3. MAPK pathway enhances the expression of rare-codon enriched transcripts.** (a) Mean  $\pm$  SEM of the ratio of GFP<sup>rare</sup> to mCherry<sup>com</sup> fluorescence of 293T cells stably infected with lentivirus encoding the indicated transgenes normalized to the fluorescence of parallel luciferase control (Ctrl) cells in the absence and presence of DMSO vehicle (-) or the SCH779284 ERK inhibitor (+) from three technical replicates. Two-way ANOVA with Sidak's multiple comparisons test: \* $p < 0.05$  and \*\*\*\* $p < 0.0001$ . (b) Expanded immunoblot for Fig. 3b. Blots separated by white space are from different parts of the same gel or from different gels at the same exposure in the same experiment. Specifically, 30 $\mu$ g and 15 $\mu$ g samples were loaded on one gel while 7.5 $\mu$ g and 3.75 $\mu$ g samples were loaded on a separate gel. (c,d) Codon Adaptation Index (CAI) plotted as a function of amino acid residue for the indicated reporters.



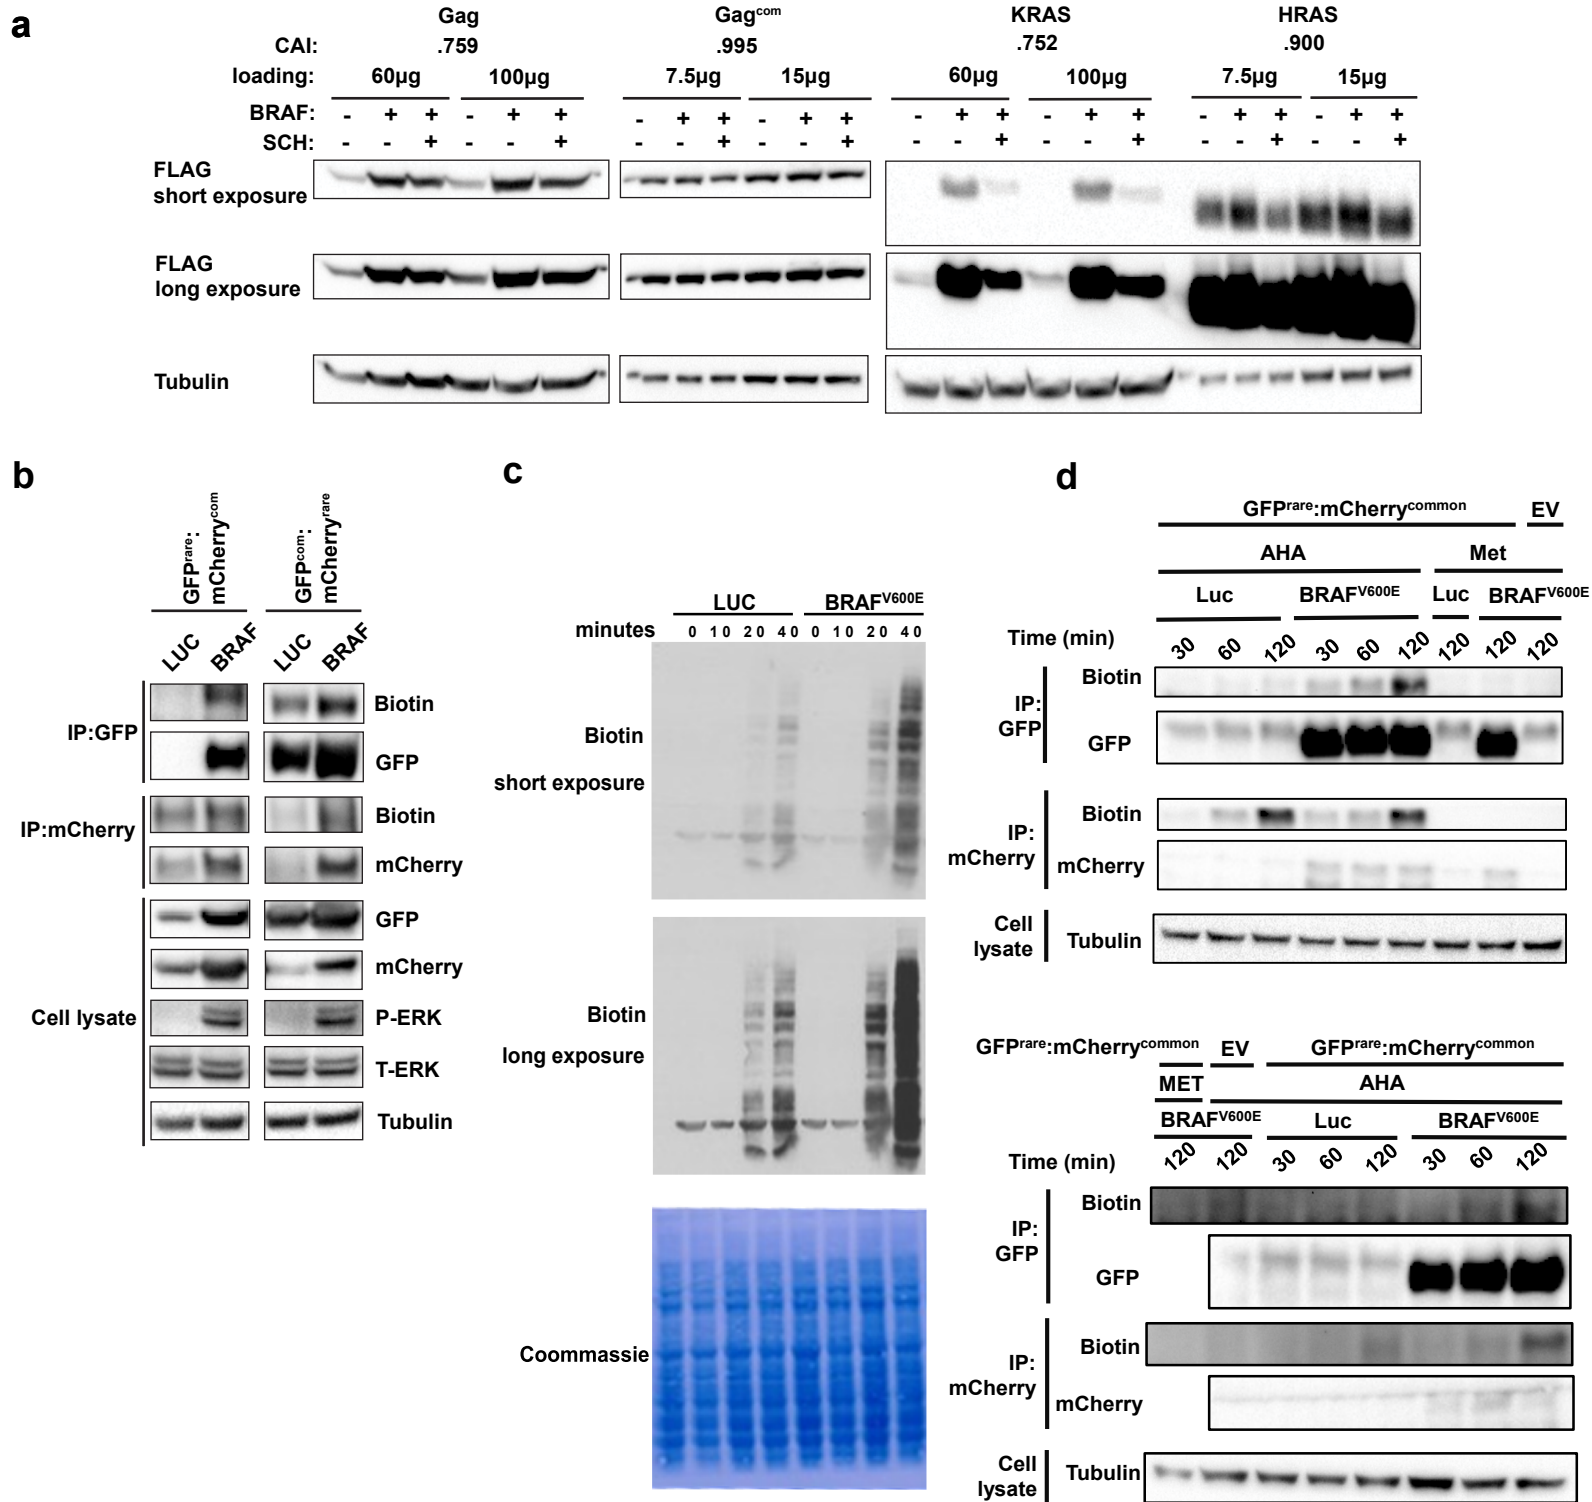

**Supplementary Figure 4. MAPK pathway enhances the translation of rare-codon enriched transcripts.** (a) Immunoblot analysis of FLAG-tagged Gag, Gag<sup>com</sup>, KRAS, HRAS, and tubulin from 293 cells co-transfected with a vector encoding either luciferase control (-) or BRAF<sup>V600E</sup> (+) and the indicated FLAG-tagged proteins in the absence (-) or presence (+) of the ERK1/2 inhibitor SCH772984 (SCH). The lysate is the same as that used for figure 3c with variations in protein loading amount as indicated. Blots separated by white space are from different gels. (b) Biological replicate of figure 3d. Left and right blots (separated by white space) are from different parts of the same gel at different exposures, except for cell lysate: mCherry, P-ERK, T-ERK and Tubulin, which are different parts of the same gel at the same exposure. (c) Immunoblot analysis of whole cell lysates derived from 293T cells transiently expressing BRAF<sup>V600E</sup> (BRAF) or control luciferase (Luc) and labeled with AHA for the indicated times. Coomassie stain: control for protein loading. One of two biological replicates. (d) Replicate experiments of immunoblot analysis of AHA-biotin labeled mCherry or GFP in 293T cells transiently expressing mCherry<sup>com</sup> and GFP<sup>rare</sup> or mCherry<sup>rare</sup> and GFP<sup>com</sup> in the presence of BRAF<sup>V600E</sup> (BRAF) or control luciferase (Luc) and labeled with AHA for the indicated times. EV: empty vector, AHA: L-Azidohomoalanine, Met: methionine.

Fig 2b

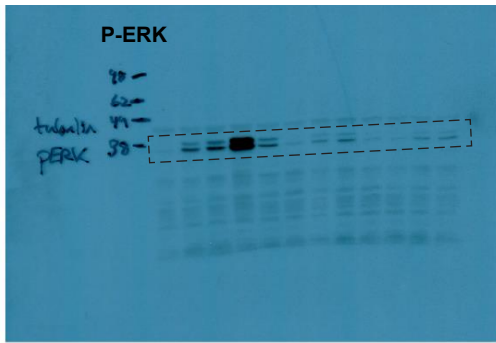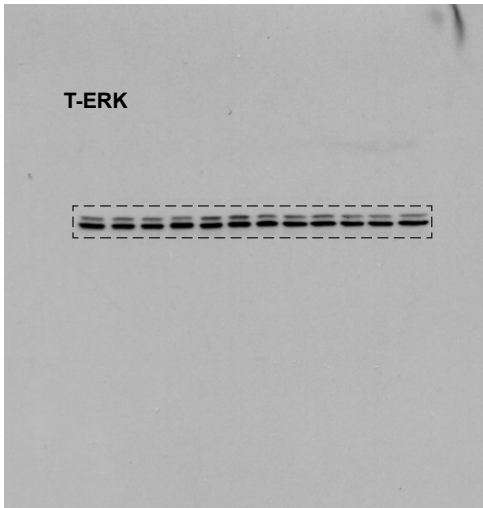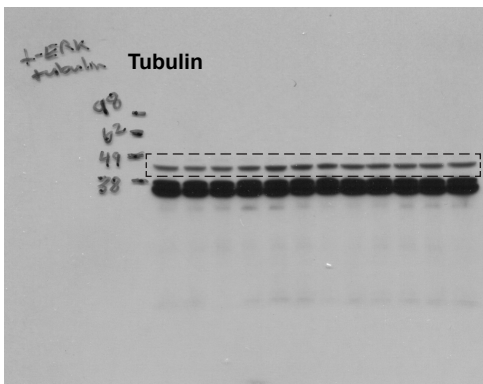

Fig 2c

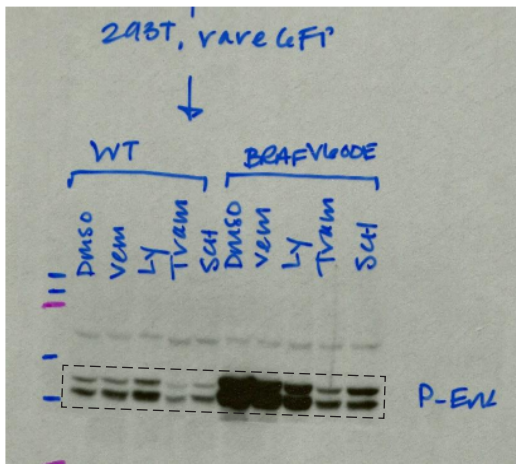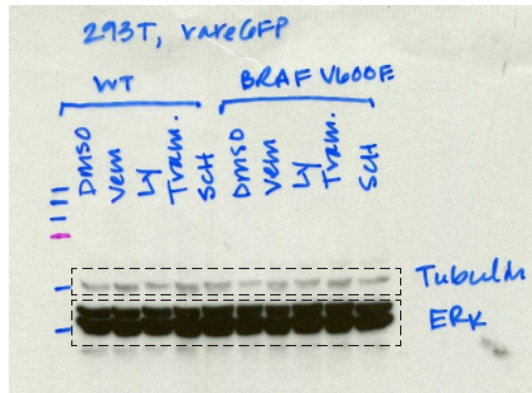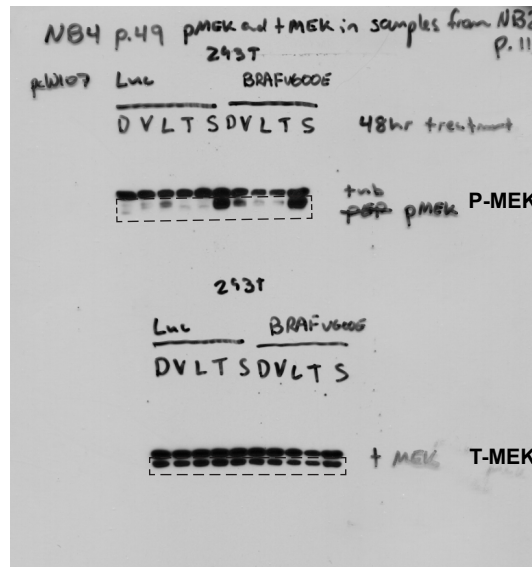

Fig 2d

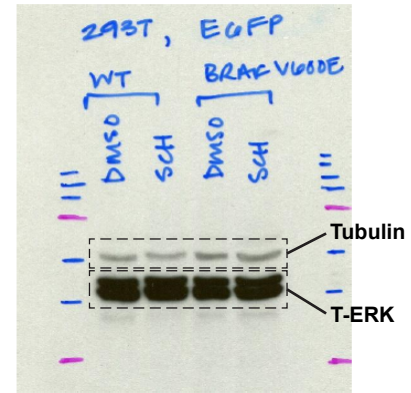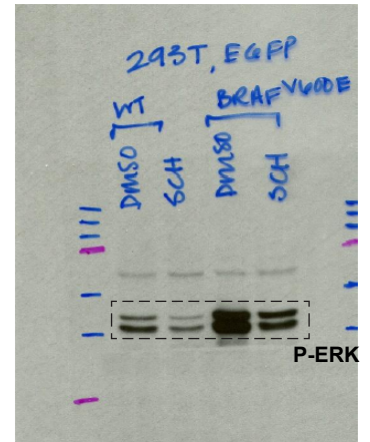

Supplementary Figure 5. Uncropped blots.

**Figure 3a**

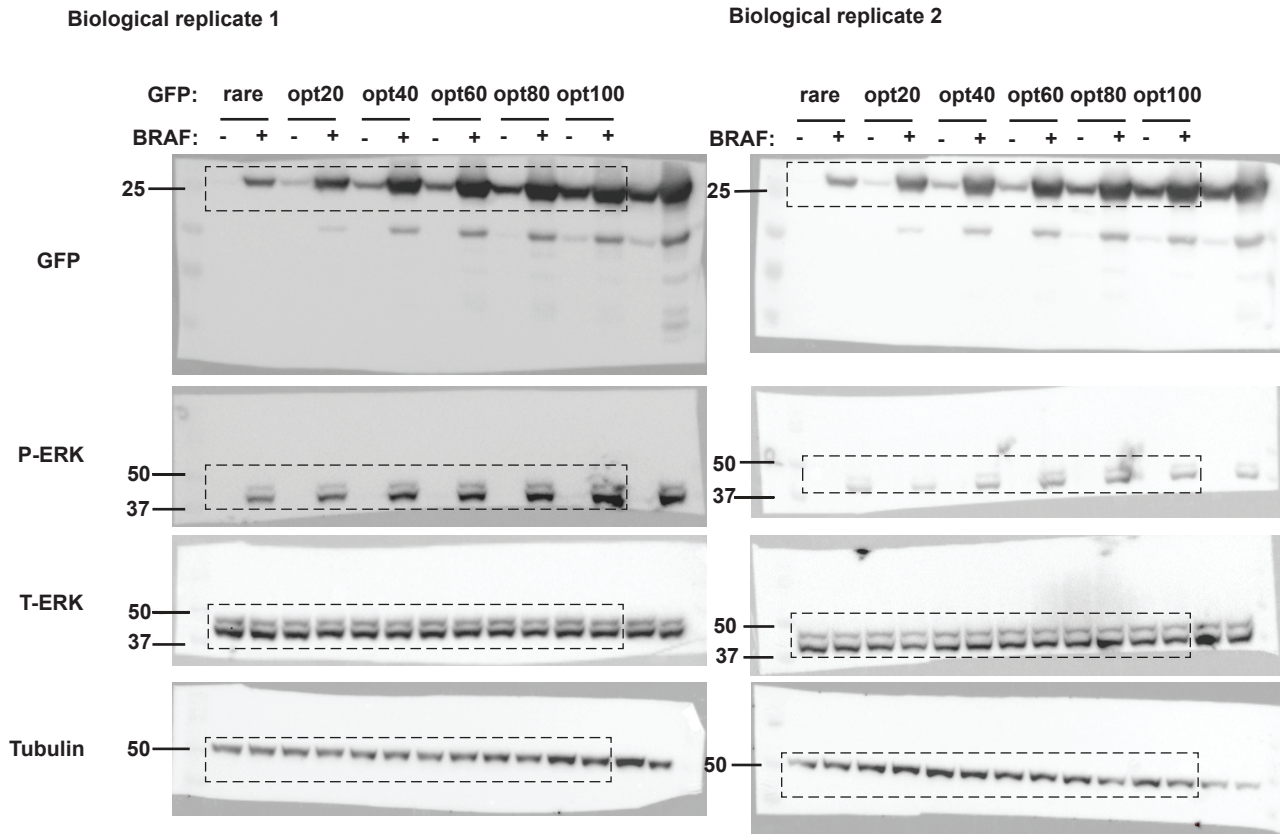

**Figure 3b (red box) and Supplementary Figure 3b (black box)**

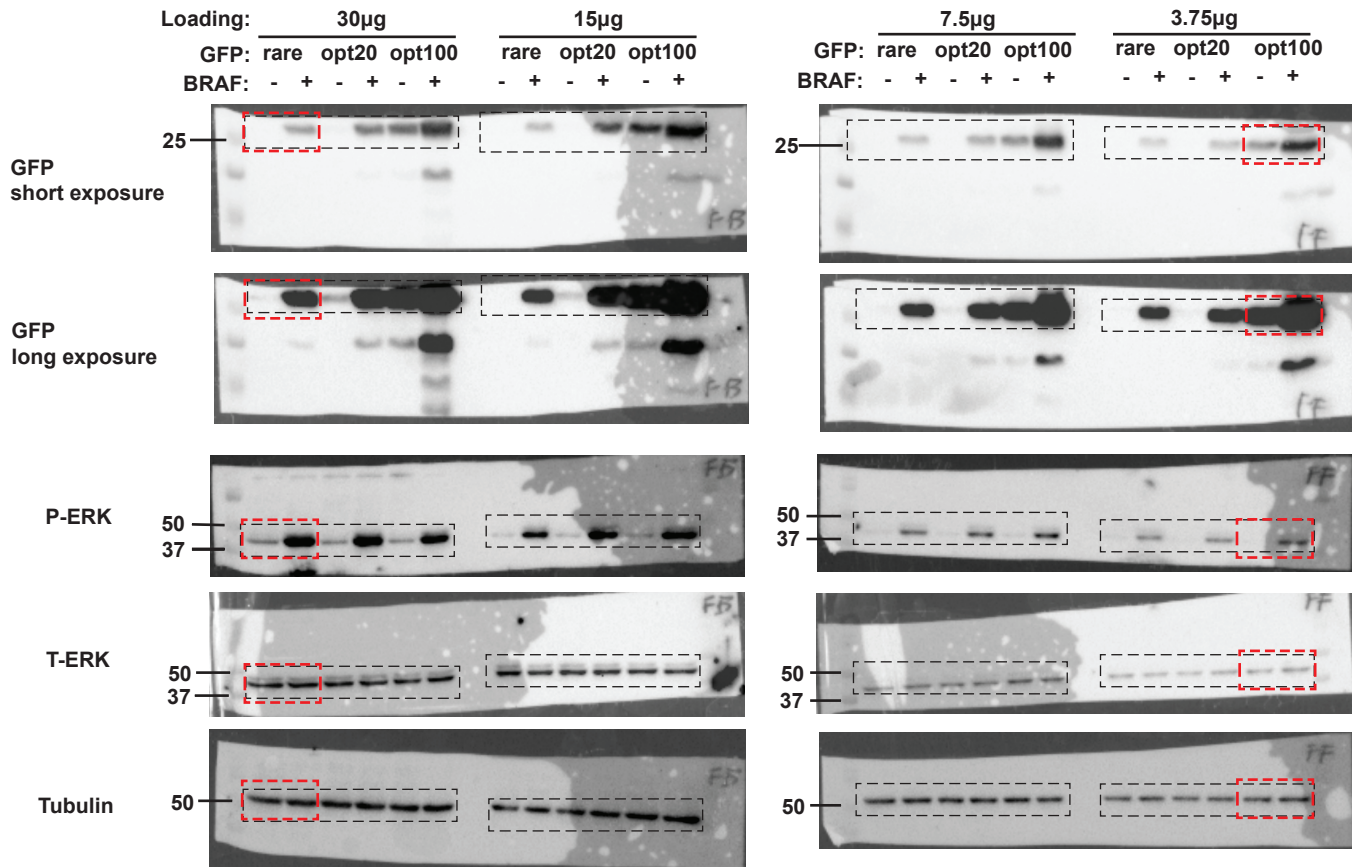

**Supplementary Figure 5, continued. Uncropped blots.**

Figure 3c

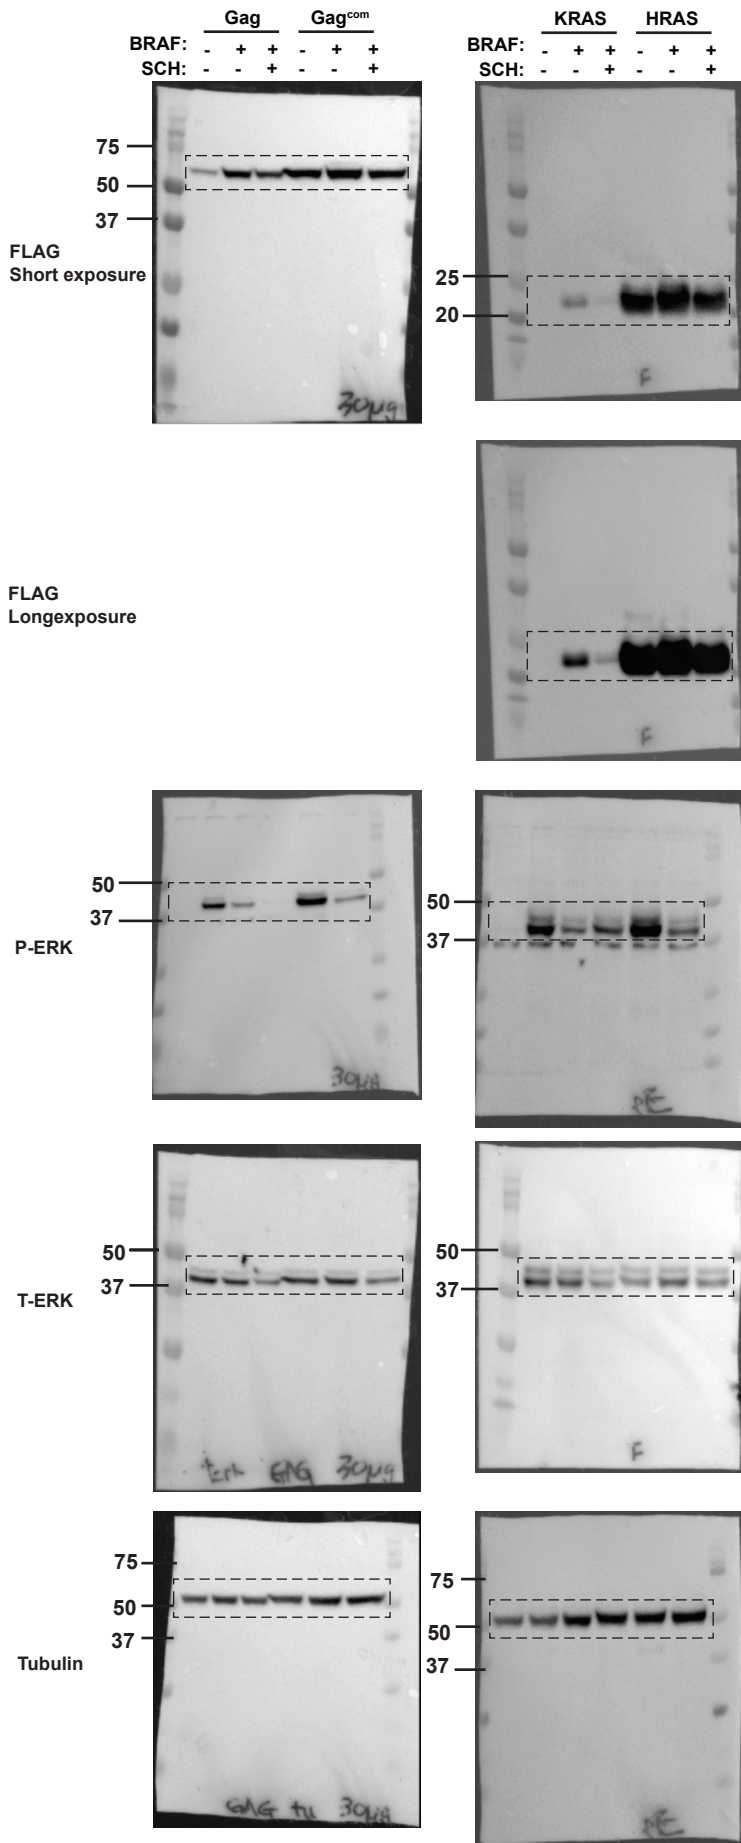

Supplementary Figure 5, continued. Uncropped blots.

Figure 3d

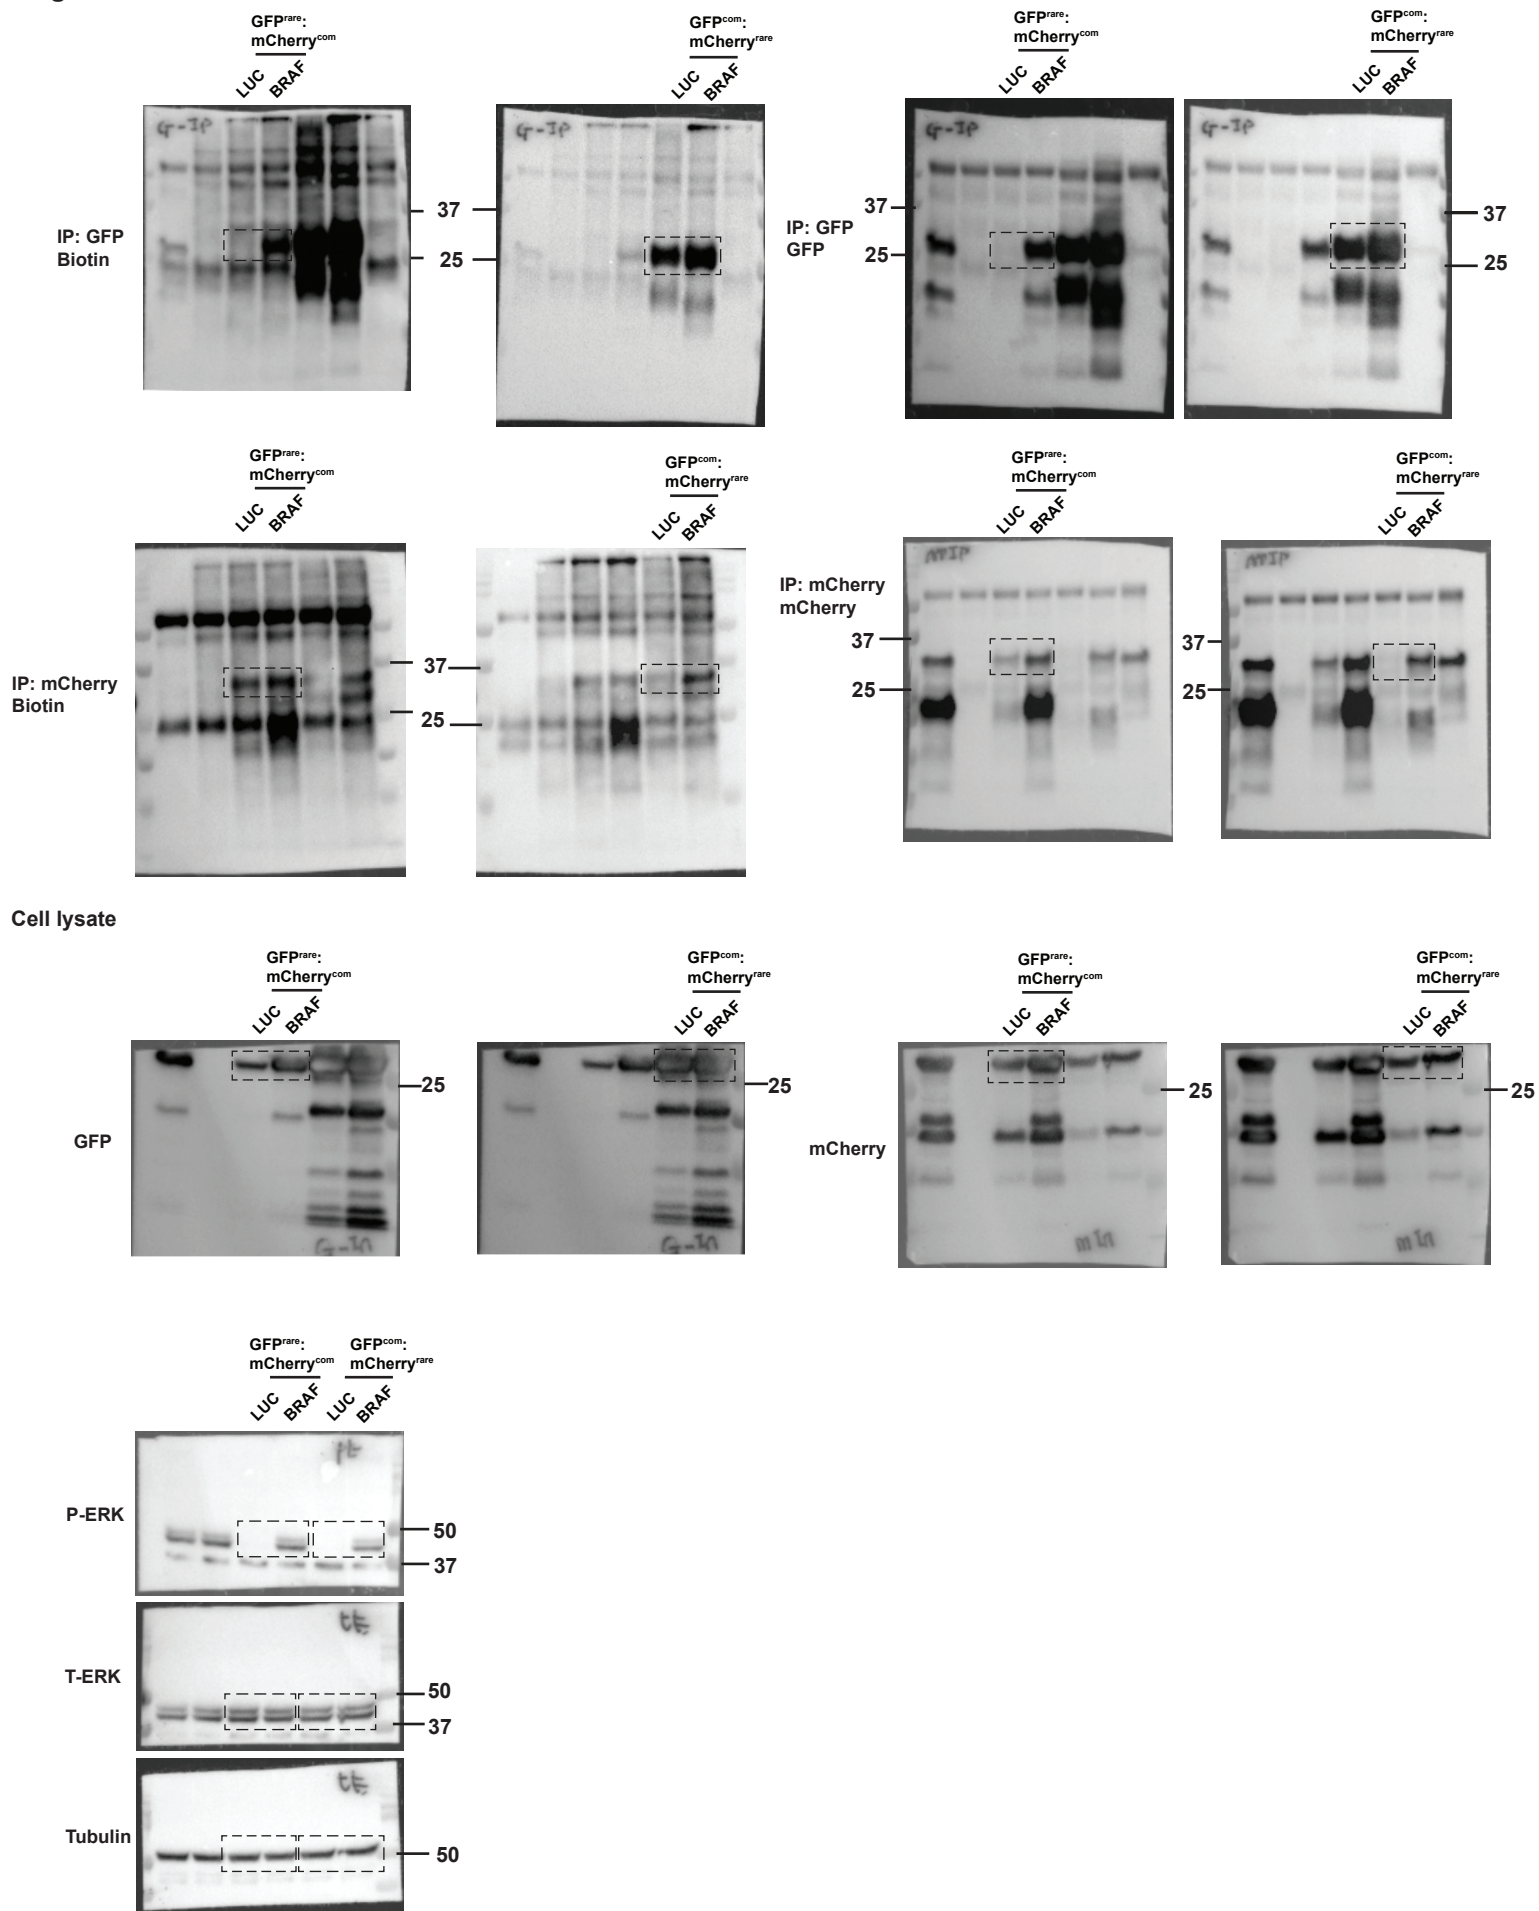

Supplementary Figure 5, continued. Uncropped blots.

Supplementary Figure 4a

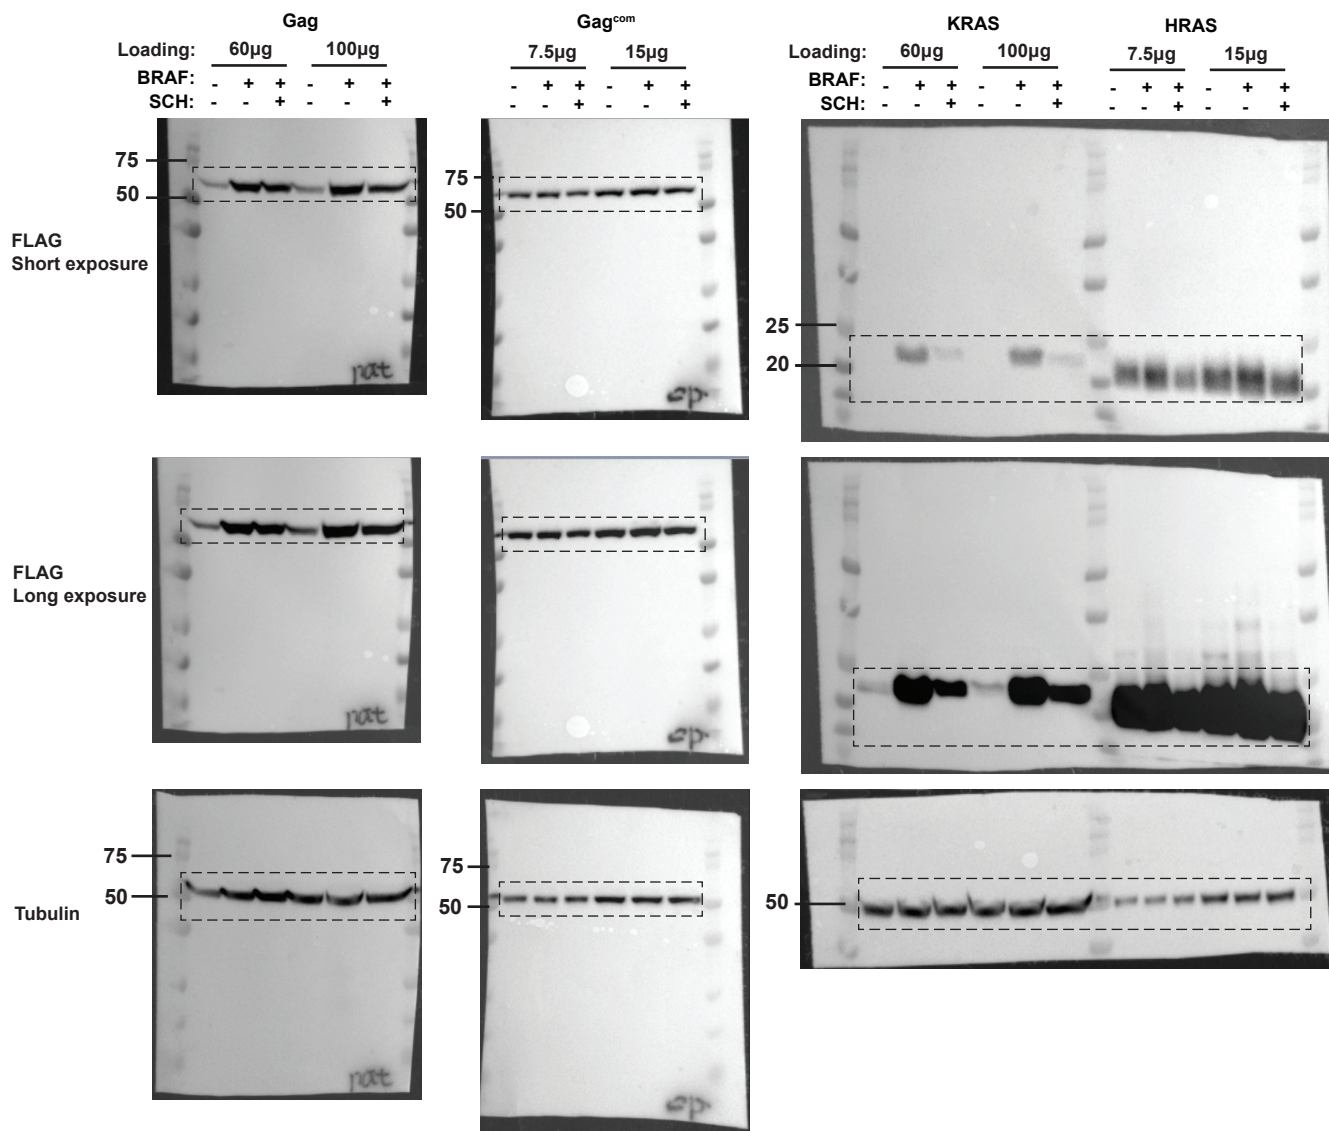

Supplementary Figure 5, continued. Uncropped blots.

Supplementary Figure 4b

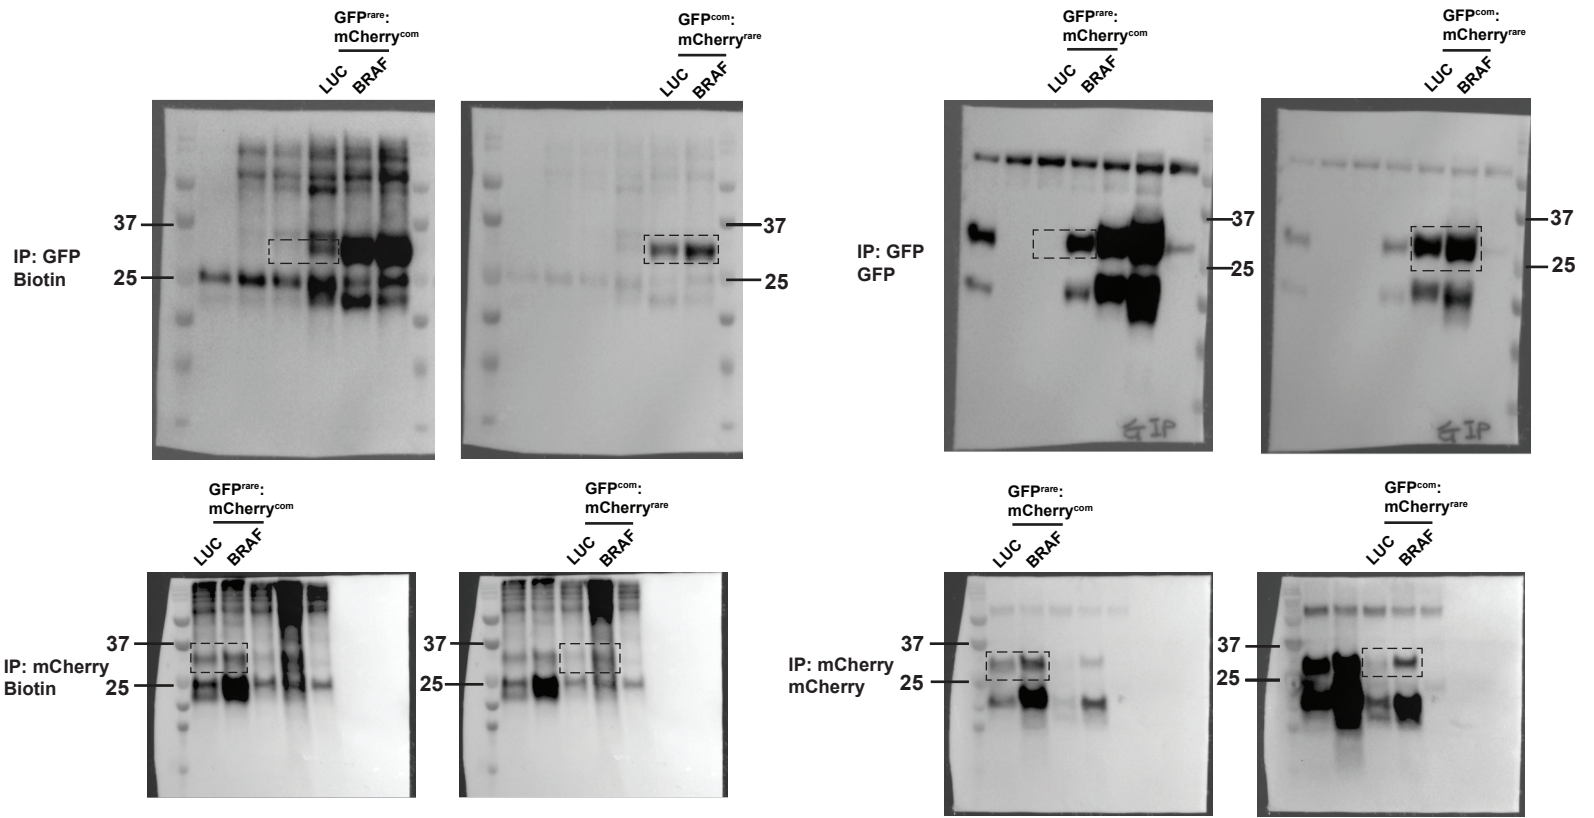

Cell lysate

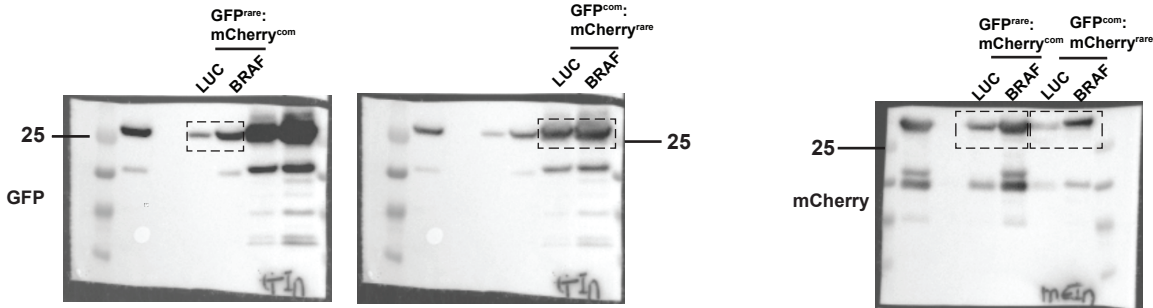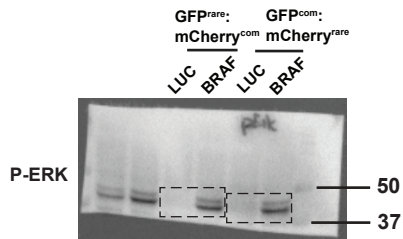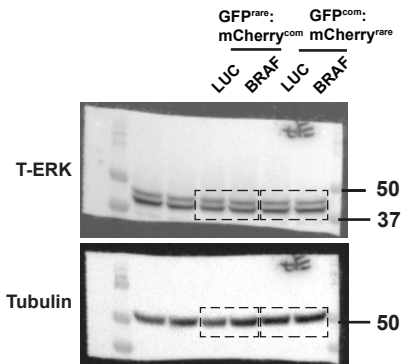

Supplementary Figure 4c Uncropped immunoblots shown in figures.

Supplementary Figure 4d top

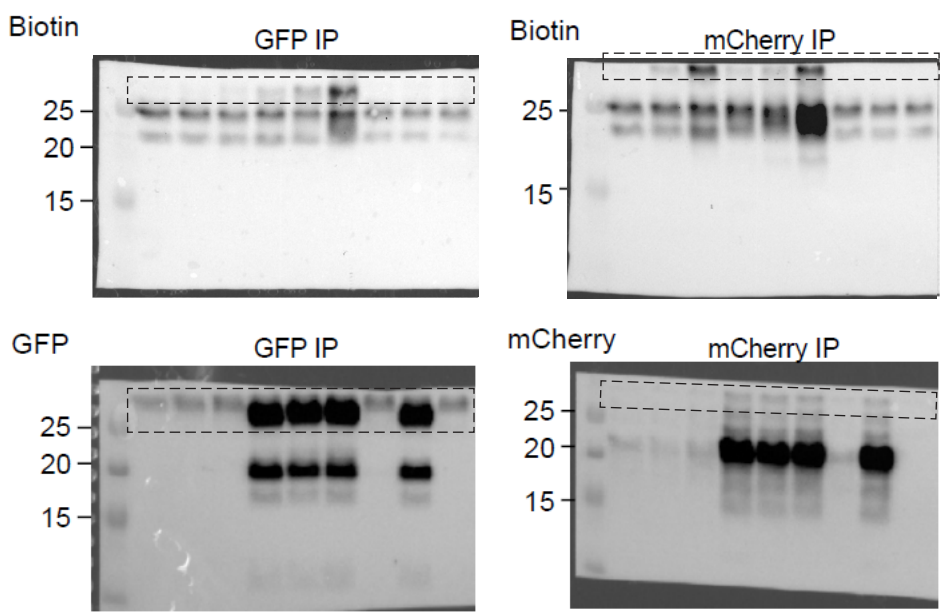

Supplementary Figure 4d bottom

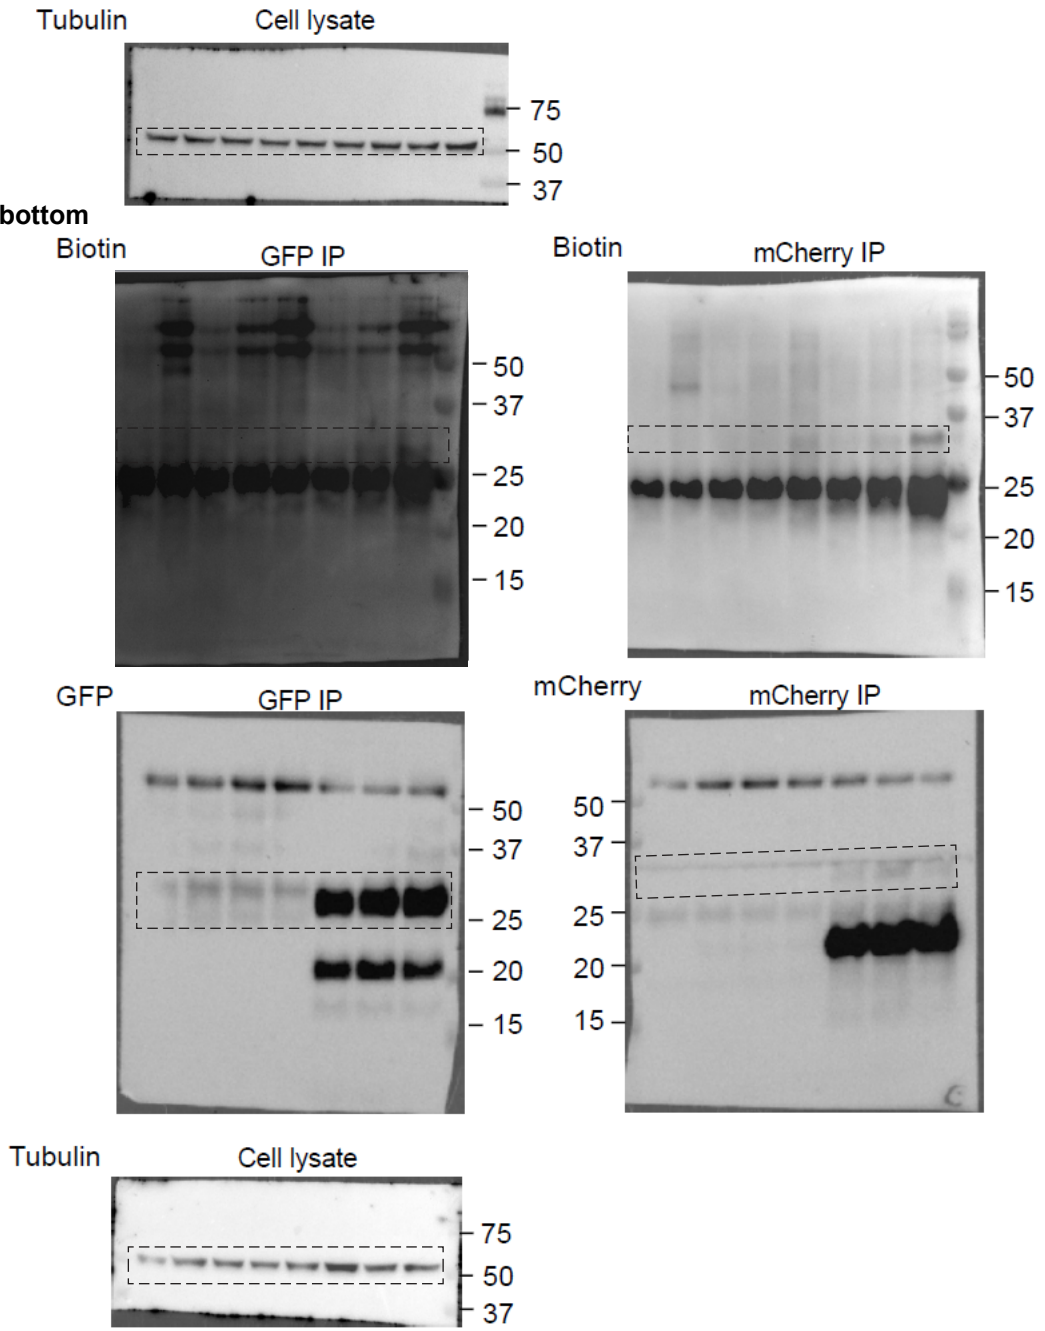

Supplementary Figure 5, continued. Uncropped blots.



| Entry Clone | Gene       | Mutation                | RefSeq               | mCherry | GFP   | GFP/mCherry | Fold over control |
|-------------|------------|-------------------------|----------------------|---------|-------|-------------|-------------------|
| R780-E002   | Luciferase | wt                      |                      |         |       |             |                   |
| R780-E003   | MAP2K1     | wt                      | NM_002755.3          | 5175    | 28972 | 0.178620737 | 0.91381           |
| R780-E004   | KRAS       | G12V                    | NM_004985.3          | 7751    | 40558 | 0.191109029 | 0.9777            |
| R780-E005   | HRAS       | G12V                    | NM_005343.2          | 14831   | 53747 | 0.275940983 | 1.41169           |
| R780-E006   | MAP2K1     | S281D/S222D             | NM_002755.3          | 6582    | 33176 | 0.198396431 | 1.01498           |
| R780-E009   | RHEB       | Q64L                    | NM_005614.3          | 5319    | 29544 | 0.180036556 | 0.92105           |
| R780-E010   | CTNNB1     | S22A/S37A/<br>T41A/S45A | NM_001165902<br>(Mm) | 6453    | 35132 | 0.183678697 | 0.93968           |
| R780-E011   | GSK3B      | K85A                    | NM_001146156.1       | 5985    | 31659 | 0.189045769 | 0.96714           |
| R780-E012   | CTNNB1     | S33Y                    | NM_001904.3          | 5178    | 26662 | 0.194208987 | 0.99356           |
| R780-E013   | TGFBR1     | wt                      | NM_004612.2          | 5102    | 27405 | 0.186170407 | 0.95243           |
| R780-E014   | BCL2       | wt                      | NM_000633.2          | 4833    | 25068 | 0.192795596 | 0.98633           |
| R780-E015   | BCL2L1     | wt                      | NM_138578.1          | 4637    | 23489 | 0.197411554 | 1.00994           |
| R780-E016   | CASP8      | C360A                   | NM_033355.3          | 5313    | 26864 | 0.197773973 | 1.01179           |
| R780-E017   | CASP3      | C163A                   | NM_032991.2          | 4848    | 25714 | 0.188535428 | 0.96453           |
| R780-E018   | TP53       | R175H                   | NM_001126114.2       | 4484    | 25023 | 0.17919514  | 0.91675           |
| R780-E019   | AKT1       | E17K                    | NM_005163.2          | 6795    | 34778 | 0.195382138 | 0.99956           |
| R780-E020   | BRAF       | V600E                   | NM_004333.4          | 13523   | 40449 | 0.334322233 | 1.71036           |
| R780-E021   | CCND1      | P287S                   | NM_053056.2          | 1093    | 6644  | 0.164509332 | 1.054727          |
| R780-E022   | EGFR       | L858R                   | NM_005228.3          | 820     | 286   | 0.348780488 | 1.074195          |
| R780-E024   | FGFR3      | S249C                   | NM_000142.4          | 1255    | 6934  | 0.180992212 | 1.160405          |
| R780-E025   | FLT3       | D835Y                   | NM_004119            | 1710    | 6003  | 0.284857571 | 1.826322          |
| R780-E026   | MAP2K1     | P124L                   | NM_002755.3          | 1049    | 335   | 0.319351764 | 0.983559          |
| R780-E027   | MTOR       | S2215Y                  | NM_004958.3          | 9149    | 764   | 0.083506394 | 1.032618          |
| R780-E029   | NFE2L2     | E79Q                    | NM_006164.4          | 1363    | 7302  | 0.186661189 | 1.19675           |
| R780-E030   | NRAS       | G12D                    | NM_002524.4          | 2771    | 16194 | 0.171112758 | 1.097064          |
| R780-E031   | NRAS       | Q61K                    | NM_002524.4          | 10620   | 47027 | 0.225827716 | 1.371798          |
| R780-E032   | PDGFRA     | E229K                   | NM_006206.4          | 817     | 282   | 0.345165239 | 1.063061          |
| R780-E033   | PIK3CA     | E545K                   | NM_006218.2          | 7832    | 675   | 0.086184883 | 1.06574           |
| R780-E034   | PIK3CA     | H1047R                  | NM_006218.2          | 1215    | 7030  | 0.172830725 | 1.108078          |
| R780-E037   | PTEN       | R130Q                   | NM_000314.4          | 11298   | 809   | 0.071605594 | 0.885456          |
| R780-E039   | STK11      | D194N                   | NM_000455            | 1192    | 6673  | 0.178630301 | 1.145262          |
| R780-E040   | KRAS       | G12C                    | NM_004985.3          | 6067    | 36722 | 0.165214313 | 1.0036            |
| R780-E041   | KRAS       | G12D                    | NM_004985.3          | 2661    | 16727 | 0.159084116 | 1.019944          |
| R780-E042   | KRAS       | G13D                    | NM_004985.3          | 2512    | 6380  | 0.393730408 | 0.961762          |
| R780-E043   | KRAS       | Q61L                    | NM_004985.3          | 960     | 409   | 0.426041667 | 1.312149          |
| R780-E044   | KRAS       | Q61R                    | NM_004985.3          | 2362    | 6329  | 0.373202718 | 1.564193          |
| R780-E045   | CTNNB1     | S37C                    | NM_001165902.1       | 6889    | 676   | 0.09812745  | 1.213419          |
| R780-E046   | BAP1       | E31A                    | NM_004656.3          | 2034    | 8222  | 0.247385064 | 1.036857          |

|           |          |       |                |       |       |             |         |
|-----------|----------|-------|----------------|-------|-------|-------------|---------|
| R780-E047 | CDH1     | D254Y | NM_004360.4    | 5959  | 38643 | 0.154206454 | 0.93673 |
| R780-E048 | EZH2     | Y646N | NM_004456      | 1278  | 4726  | 0.270418959 | 1.1334  |
| R780-E049 | GATA2    | H460P | NM_032638.4    | 1138  | 5454  | 0.208654199 | 0.87453 |
| R780-E051 | IDH1     | R132H | NM_005896      | 1905  | 5498  | 0.346489633 | 1.45223 |
| R780-E053 | MLH1     | R217C | NM_000249.3    | 1307  | 7381  | 0.177076277 | 1.1353  |
| R780-E054 | MSH2     | Q419K | NM_000251.2    | 5787  | 32458 | 0.178291947 | 1.08304 |
| R780-E055 | MYD88    | L265P | NM_002468.4    | 1749  | 7158  | 0.244341995 | 1.56656 |
| R780-E056 | RET      | M918T | NM_020630.4    | 1323  | 8093  | 0.163474608 | 1.04809 |
| R780-E057 | STAG2    | R370W | NM_006603.4    | 1327  | 5547  | 0.239228412 | 1.00267 |
| R780-E058 | U2AF1    | S34F  | NM_006758      | 1351  | 7413  | 0.182247403 | 1.16845 |
| R780-E059 | SMAD4    | R361H | NM_005359.5    | 1219  | 4638  | 0.262828806 | 1.10159 |
| R780-E060 | TET2     | S268A | NM_001127208.2 | 9423  | 691   | 0.073331211 | 0.90679 |
| R780-E061 | JAK3     | L527R | NM_000215.3    | 1308  | 7665  | 0.170645793 | 1.09407 |
| R780-E062 | MAP2K4   | R134W | NM_003010.3    | 1074  | 6413  | 0.167472322 | 1.07372 |
| R780-E063 | RUNX1    | D198G | NM_001754.4    | 1209  | 6073  | 0.199077886 | 0.83439 |
| R780-E065 | VHL      | N78D  | NM_000551.3    | 1689  | 8860  | 0.190632054 | 1.22221 |
| R780-E066 | KLF4     | K409Q | NM_004235.5    | 1780  | 8469  | 0.210178297 | 1.34753 |
| R780-E069 | CYLD     | G160R | NM_001042412.1 | 7036  | 729   | 0.103610006 | 1.28121 |
| R780-E070 | SMAD2    | R321Q | NM_005901.5    | 6067  | 34426 | 0.17623308  | 1.07053 |
| R780-E071 | ACVR1B   | R484H | NM_004302.4    | 1292  | 7308  | 0.176792556 | 1.13348 |
| R780-E072 | HGF      | E199K | NM_000601.5    | 4065  | 641   | 0.157687577 | 1.02042 |
| R780-E073 | BCL2     | R98H  | NM_000633.2    | 4350  | 700   | 0.16091954  | 1.04134 |
| R780-E075 | CHEK2    | K373E | NM_007194.3    | 4284  | 671   | 0.156629318 | 1.01358 |
| R780-E076 | KEAP1    | R470C | NM_203500.1    | 4827  | 700   | 0.145017609 | 0.93844 |
| R780-E077 | FOXA1    | I176M | NM_004496.3    | 3701  | 563   | 0.152121048 | 0.9844  |
| R780-E079 | EIF4A2   | G336W | NM_001967.3    | 4525  | 688   | 0.152044199 | 0.98391 |
| R780-E080 | ELF3     | S133F | NM_004433.4    | 5328  | 33130 | 0.160821008 | 0.97691 |
| R780-E081 | HIST1H1C | K109N | NM_005319.3    | 4192  | 665   | 0.158635496 | 1.02656 |
| R780-E082 | CDKN1B   | D63E  | NM_004064.4    | 2160  | 5027  | 0.429679729 | 1.04957 |
| R780-E083 | CBFB     | R151H | NM_001755.2    | 5540  | 34261 | 0.161699892 | 0.98225 |
| R780-E084 | CDKN1A   | W49L  | NM_000389.4    | 4200  | 670   | 0.15952381  | 1.03231 |
| R780-E085 | H3F3B    | G35R  | NM_005324.4    | 4139  | 617   | 0.149069824 | 0.96466 |
| R780-E086 | GNAS     | R201H | NM_000516.5    | 12413 | 76364 | 0.162550416 | 0.98742 |
| R780-E087 | B4GALT3  | H194Y | NM_003779.3    | 5821  | 37704 | 0.154386802 | 0.93783 |
| R780-E088 | SPOP     | F133L | NM_003563.3    | 5344  | 32796 | 0.162946701 | 0.98982 |
| R780-E089 | TSC1     | R786Q | NM_000368      | 21888 | 1617  | 0.073876096 | 0.91353 |

**Supplementary Table 1.** Summary of the Cancer Toolkit (CTK) lentiviral library screen.
